# Supplementary material
Source: PubMed Central journal article supplement (PMC2311369)
Supplement: 0711551105_Supplemental_PDF.pdf [file 0711551105_Supplemental_PDF.pdf]

# Supporting Information

Scalliet *et al.* 10.1073/pnas.0711551105

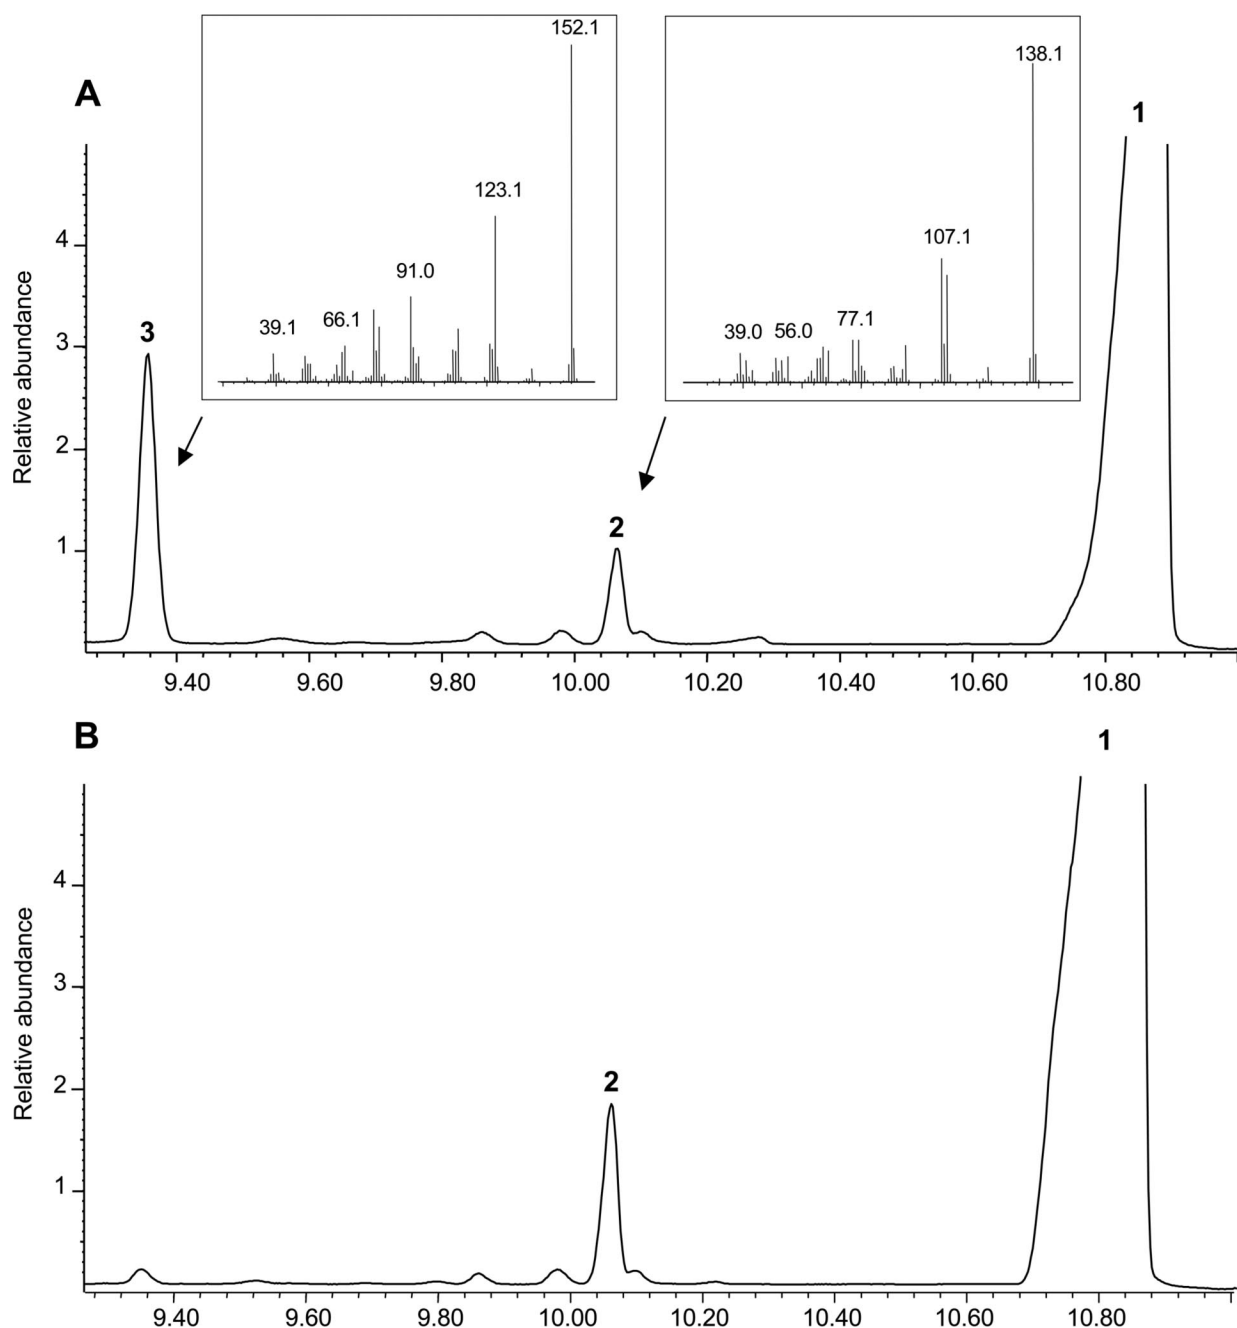

**Fig. S1.** Gas chromatography-mass spectrometry (GC-MS) analysis of mutant OOMTs reaction products. (A) Incubation of OOMT1 Y127F with orcinol (500  $\mu$ M) in the presence of *S*-adenosyl-L-methionine (1 mM). (B) Incubation of OOMT2 F126Y with orcinol (500  $\mu$ M) in the presence of *S*-adenosyl-L-methionine (1 mM). Peak 1, orcinol; peak 2, MHT; peak 3, DMT. Total ion chromatograms are shown, and mass spectra of the peaks matched those of the corresponding authentic standards. Reactions were carried out in a total volume of 200  $\mu$ l with 2  $\mu$ g of purified protein and were allowed to proceed for 60 min. GC-MS analyses were performed according to Lavid *et al.* [Lavid N, *et al.* (2002) *Plant Physiol* 129:1899–1907]. Reaction products of native OOMT1 and OOMT2 were characterized previously by Lavid *et al.*

**Table S1. Kinetic parameters of OOMTs with orcinol and MHT**

| Gene name                           | ORCINOL                  |                                              |                                                        |                                                          | MHT                      |                                              |                                                        |                                                          |
|-------------------------------------|--------------------------|----------------------------------------------|--------------------------------------------------------|----------------------------------------------------------|--------------------------|----------------------------------------------|--------------------------------------------------------|----------------------------------------------------------|
|                                     | $K_m$ ,<br>$\mu\text{M}$ | $K_{cat} \cdot 10^{-3}$ ,<br>$\text{s}^{-1}$ | $K_{cat}/K_m$<br>$(\text{M}^{-1} \cdot \text{s}^{-1})$ | Specific activity,<br>$\text{pkat} \cdot \text{mg}^{-1}$ | $K_m$<br>$(\mu\text{M})$ | $K_{cat} \cdot 10^{-3}$ ,<br>$\text{s}^{-1}$ | $K_{cat}/K_m$ ,<br>$\text{M}^{-1} \cdot \text{s}^{-1}$ | Specific activity,<br>$\text{pkat} \cdot \text{mg}^{-1}$ |
| Old Blush OOMT1                     | 69 (7)                   | 174 (4)                                      | 2,538 (202)                                            | 2,200 (49)                                               | 50 (4)                   | 19 (2.5)                                     | 386 (16)                                               | 241 (30)                                                 |
| Old Blush OOMT2                     | 127 (24)                 | 37 (2)                                       | 304 (56)                                               | 460 (18)                                                 | 11 (1)                   | 52 (3)                                       | 4,797 (349)                                            | 657 (38)                                                 |
| Old Blush OOMT1 Y127F               | 170 (9)                  | 27 (3)                                       | 158 (24)                                               | 333 (32)                                                 | 31 (5)                   | 53 (2)                                       | 1,739 (259)                                            | 665 (22)                                                 |
| Old Blush OOMT2 F126Y               | 93 (4)                   | 22 (2)                                       | 242 (3)                                                | 280 (14)                                                 | 90 (9)                   | 3.7 (0.3)                                    | 42 (7)                                                 | 47 (3)                                                   |
| <i>R. chinensis</i> B (OOMT1-like)  | 56 (8)                   | 183 (9)                                      | 3,083 (453)                                            | 2,296 (122)                                              | 60 (8)                   | 28 (1.4)                                     | 593 (99)                                               | 352 (17)                                                 |
| <i>R. gigantea</i> E (OOMT1-like)   | 106 (9)                  | 171 (10)                                     | 1,618 (240)                                            | 2,140 (134)                                              | 58 (10)                  | 22 (2)                                       | 370 (13)                                               | 277 (37)                                                 |
| <i>R. roxburghii</i> A (OOMT2-like) | 52 (3)                   | 15 (1.5)                                     | 303 (16)                                               | 189 (6)                                                  | 9.5 (1.5)                | 30 (1)                                       | 3,060 (361)                                            | 379 (9)                                                  |
| <i>R. rugosa</i> A (OOMT2-like)     | 72 (5)                   | 10 (0.4)                                     | 140 (4)                                                | 126 (5)                                                  | 8 (1.4)                  | 24 (0.5)                                     | 3017 (437)                                             | 297 (4)                                                  |

Data are expressed as the means of triplicates assays and standard errors are indicated in parentheses.



| Section                     | Species                                                    | Gene                                  | Size, bp        | Accession       | OOMT Type |   |
|-----------------------------|------------------------------------------------------------|---------------------------------------|-----------------|-----------------|-----------|---|
| <i>Indicae</i>              | <i>R. chinensis</i> cv.<br>Old Blush                       | <b>OOMT1</b>                          | 1324            | <b>AJ786302</b> | <b>1</b>  |   |
|                             |                                                            | OOMT2                                 | 1321            | AJ786303        | 2         |   |
|                             | A                                                          | 1302                                  | <b>AM182763</b> | <b>1</b>        |           |   |
|                             | B                                                          | 1305                                  | AM182764        | 2               |           |   |
|                             | C                                                          | 1305                                  | AM182765        | 2               |           |   |
|                             | D                                                          | 1333                                  | <b>AM182766</b> | <b>1</b>        |           |   |
|                             | E                                                          | 1324                                  | <b>AM182767</b> | <b>1</b>        |           |   |
|                             | F                                                          | 1337                                  | AM182768        | 2               |           |   |
|                             |                                                            | pseudogene A                          | 668             | AM182834        | 2         |   |
|                             | <i>R. chinensis</i><br><i>spontanea</i>                    | A                                     | 1305            | AM182780        | 2         |   |
|                             |                                                            | <b>B</b>                              | 1324            | <b>AM182781</b> | <b>1</b>  |   |
|                             |                                                            | <b>C</b>                              | 1324            | <b>AM182782</b> | <b>1</b>  |   |
|                             |                                                            | D                                     | 1321            | AM182783        | 2         |   |
|                             |                                                            | E                                     | 1324            | <b>AM182784</b> | <b>1</b>  |   |
|                             |                                                            | F                                     | 1305            | AM182785        | 2         |   |
|                             |                                                            | G                                     | 1305            | AM182786        | 2         |   |
|                             |                                                            | H                                     | 1305            | AM182787        | 2         |   |
|                             | <i>R. gigantea</i>                                         | <b>A</b>                              | 1324            | <b>AM182794</b> | <b>1</b>  |   |
|                             |                                                            | B                                     | 1324            | AM182795        | 2         |   |
|                             |                                                            | <b>C</b>                              | 1324            | <b>AM182796</b> | <b>1</b>  |   |
|                             |                                                            | D                                     | 1324            | AM182797        | 2         |   |
|                             |                                                            | <b>E</b>                              | 1324            | <b>AM182798</b> | <b>1</b>  |   |
|                             |                                                            | F                                     | 1324            | AM182799        | 2         |   |
|                             |                                                            | G                                     | 1324            | AM182800        | 2         |   |
|                             |                                                            | H                                     | 1321            | AM182801        | 2         |   |
|                             |                                                            | I                                     | 1324            | AM182802        | 2         |   |
|                             |                                                            | <b>J</b>                              | 1324            | <b>AM182803</b> | <b>1</b>  |   |
|                             |                                                            | K                                     | 1309            | AM182804        | 2         |   |
|                             |                                                            |                                       | pseudogene A    | 1261            | AM182842  | 2 |
|                             |                                                            | <i>R. odorata</i> cv.<br>Hume's Blush | A               | 1324            | AM182823  | 2 |
|                             |                                                            |                                       | B               | 1321            | AM182824  | 2 |
|                             |                                                            |                                       | C               | 1324            | AM182825  | 2 |
|                             | <b>D</b>                                                   |                                       | 1324            | <b>AM182826</b> | <b>1</b>  |   |
|                             | E                                                          |                                       | 1321            | AM182827        | 2         |   |
|                             | F                                                          |                                       | 1337            | AM182828        | 2         |   |
|                             | <b>A</b>                                                   |                                       | 1324            | <b>AM182829</b> | <b>1</b>  |   |
|                             | <i>R. odorata</i><br><i>ochroleuca</i> cv.<br>Parks Yellow | B                                     | 1324            | AM182830        | 2         |   |
|                             |                                                            | C                                     | 1324            | AM182831        | 2         |   |
|                             |                                                            | D                                     | 1337            | AM182832        | 2         |   |
|                             |                                                            | E                                     | 1324            | <b>AM182833</b> | <b>1</b>  |   |
|                             |                                                            | A                                     | 1278            | AM182805        | 2         |   |
|                             | <i>Pimpinellifoliae</i>                                    | <i>R. hugonis</i>                     | B               | 1278            | AM182806  | 2 |
|                             |                                                            |                                       | A               | 1330            | AM182811  | 2 |
| <i>Synstylae</i>            | <i>R. phoenicia</i>                                        | A                                     | 1328            | AM182817        | 2         |   |
|                             |                                                            | B                                     | 1328            | AM182818        | 2         |   |
|                             | <i>R. wichuraiana</i>                                      | C                                     | 1328            | AM182819        | 2         |   |
|                             |                                                            | D                                     | 1328            | AM182820        | 2         |   |
|                             |                                                            | E                                     | 1328            | AM182821        | 2         |   |
|                             |                                                            | F                                     | 1328            | AM182822        | 2         |   |
| Subgenus <i>Platyrhodon</i> | <i>R. roxburghii</i>                                       | A                                     | 1324            | AM182812        | 2         |   |
|                             |                                                            | pseudogene A                          | 1309            | AM182849        | 2         |   |
|                             |                                                            | pseudogene B                          | 1298            | AM182850        | 2         |   |

OOMT1-like genes (based on the presence of a tyrosine residue at the position corresponding to residue 127 in Old Blush 1) are indicated in bold.
